# Supplementary material
Source: Springer Nature journal article supplement (https://www.springermedizin.de/resource/supplementary/12885_2008_1421_MOESM2_ESM.pdf/9473100)

**A**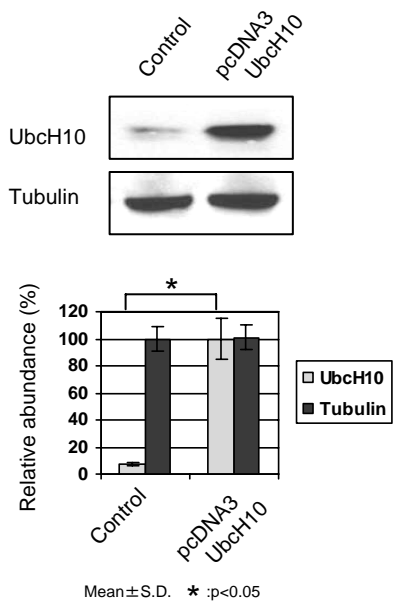**B**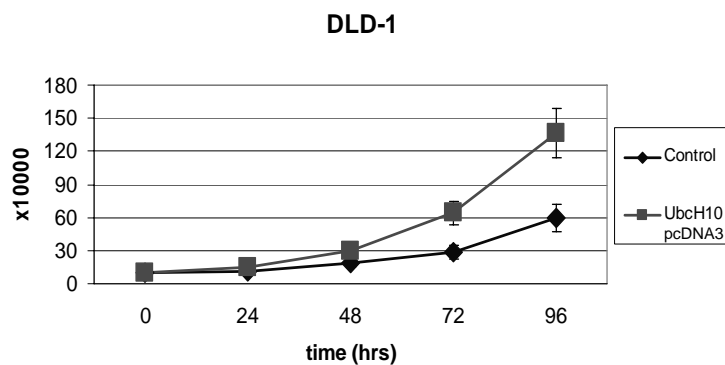**C**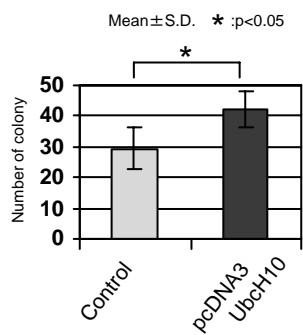**D**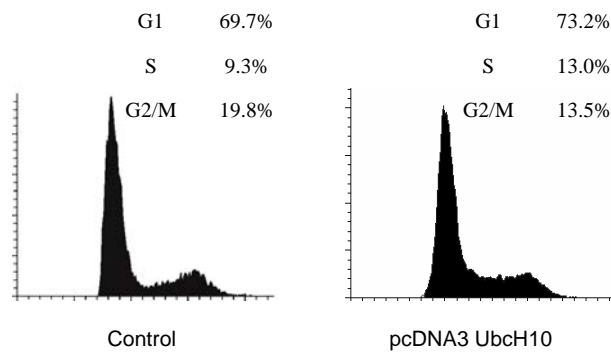**E****(a)**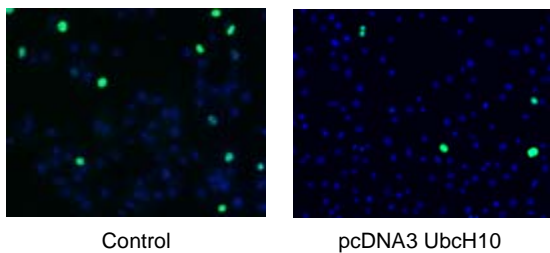**(b)**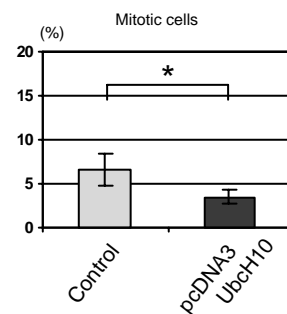

Supplement: MOESM2 [file 9473100]
